# Supplementary material for: Speciation network in Laurasiatheria: retrophylogenomic signals
Source: HighWire-hosted journal article supplement (doi:10.1101/gr.210948.116), 2017-03-15
Supplement: Supplemental_Data.docx [file Supplemental_Data.docx]

**Supplemental Data**

Supplemental Table S1a: Presence/absence table of 102 informative retrotransposon markers with "-" state in Eulipotyphla.

Supplemental Table S1b: Presence/absence table of informative retrotransposon markers for the monophyly of Chiroptera+Perissodactyla+Cetartiodactyla+Carnivora group and Laurasiatheria monophyly.

Supplemental Table S1c: Presence/absence table of 102 informative retrotransposon markers for neighbor-net analysis (SplitsTree) and the most parsimonious tree reconstruction (Dollop in Phylip).

Supplemental Table S1d: Presence/absence table of retrotransposon markers with "?" state in Eulipotyphla.

Supplemental Table S1e: Presence/absence table of retrotransposon markers with conflicting patterns in Pholidota or Eulipotyphla.

Supplemental Table S2: Reasons for excluding previously detected markers.

Supplemental Table S3: Presence/absence table of all informative deletion markers.

Supplemental Table S4: Neighbor-net analyses (SplitsTree) of the ten concatenated alignments representing flanking regions of retrotransposon markers.

Supplemental Table S5: List of investigated species and sources of genome information from NCBI and UCSC Genome Bioinformatics.

Supplemental Material S1: 4-Lineage Insertion Likelihood test.

Supplemental Material S2a: Used 2-way genome alignments from UCSC Santa Cruz.

Supplemental Material S2b: Links to public RepeatMasker reports.

Supplemental Material S2c: Links to genomic sequences.

Supplemental Material S3: Alignments of retrotransposon markers for Chiroptera-Perissodactyla-Cetartiodactyla-Carnivora relationships.

Supplemental Material S4: Concatenated alignments of retrotransposon flanking regions.

Supplemental Material S5: Alignments of deletion markers
