# Supplementary material for: Speciation network in Laurasiatheria: retrophylogenomic signals
Source: HighWire-hosted journal article supplement (doi:10.1101/gr.210948.116), 2017-03-15
Supplement: Supplemental_Table_S2.pdf [file Supplemental_Table_S2.pdf]

**Supplemental Table S2: Reasons for excluding previously detected**

| Genome position (cow) |                         | Marker* | Presence          | Reason for not detecting                                                         |
|-----------------------|-------------------------|---------|-------------------|----------------------------------------------------------------------------------|
| chr1                  | 96,558,839-96,559,927   | N265    | horse+ dog+       | Miss-alignments in 2-ways                                                        |
| chr2                  | 89,508,583-89,509,011   | H/B901  | bat+ dog+         | Insertion is not a 3' region of LINE; old and probably inactive L1MEc            |
| chr2                  | 134,089,587-134,091,396 | N283    | horse+ cow+ dog+  | L1MA9 overlap with flank by 12 nt                                                |
| chr3                  | 67,728,964-67,729,179   | N382    | horse+ bat+ dog+  | Miss-alignments in 2-ways                                                        |
| chr6                  | 58,805,911-58,806,784   | N189    | horse+ dog+       | Miss-alignments in 2-ways (two parallel insertions without clear interpretation) |
|                       | 58,805,806-58,806,230   | H8382   | horse+ bat+ cow+  |                                                                                  |
| chr6                  | 89,168,890-89,169,342   | H/B1676 | bat+ cow+ dog+    | L1MC1 overlap with both flanks by 15 nt and 19 nt                                |
| chr7                  | 14,744,403-14,744,892   | H75125  | horse+ dog+       | Insertion is not the 3' region of LINE                                           |
| chr8                  | 53,779,449-53,779,900   | H6017   | horse+ bat+ dog+  | Miss-alignments in 2-ways                                                        |
| chr14                 | 62,827,384-62,827,877   | H/B1522 | horse+ bat+ cow+  | Insertion is not the 3' region of LINE                                           |
| chr16                 | 3,212,980-3,213,408     | H7214   | bat+ cow + dog+   | Short insertion not detected in 2-ways                                           |
|                       | 3,212,964-3,213,491     | H41443  |                   |                                                                                  |
| chr21                 | 28,973,565-28,974,082   | N165    | horse+ bat + dog+ | Additional long sequence in cow (absence not clean)                              |
| chr21                 | 57,424,882-57,425,208   | H/B1060 | horse+ bat+ dog+  | Insertion is not a 3' region of LINE; old and probably inactive L1M5             |
| chr23                 | 32,856,614-32,856,993   | H42785  | horse+ dog+       | L1MA9 cover less than 70% of gap                                                 |
| chr26                 | 33,220,496-33,221,281   | N391    | horse+ bat+ dog+  | Insertion is not a 3' region of LINE; old and probably inactive L1MEc            |
|                       | 33,220,895-33,221,224   | H44900  |                   |                                                                                  |

\*markers labeled “H” were taken from the work of Hallström et al. (2011), and markers labeled “N” were taken from the work of Nishihara et al. (2006). Green letters denote markers that we detected under relaxed search criteria (see manuscript).
